# Supplementary material for: Going Deeper: Metagenome of a Hadopelagic Microbial Community
Source: PLOS journal article supplement (doi:10.1371/journal.pone.0020388), 2011-05-24

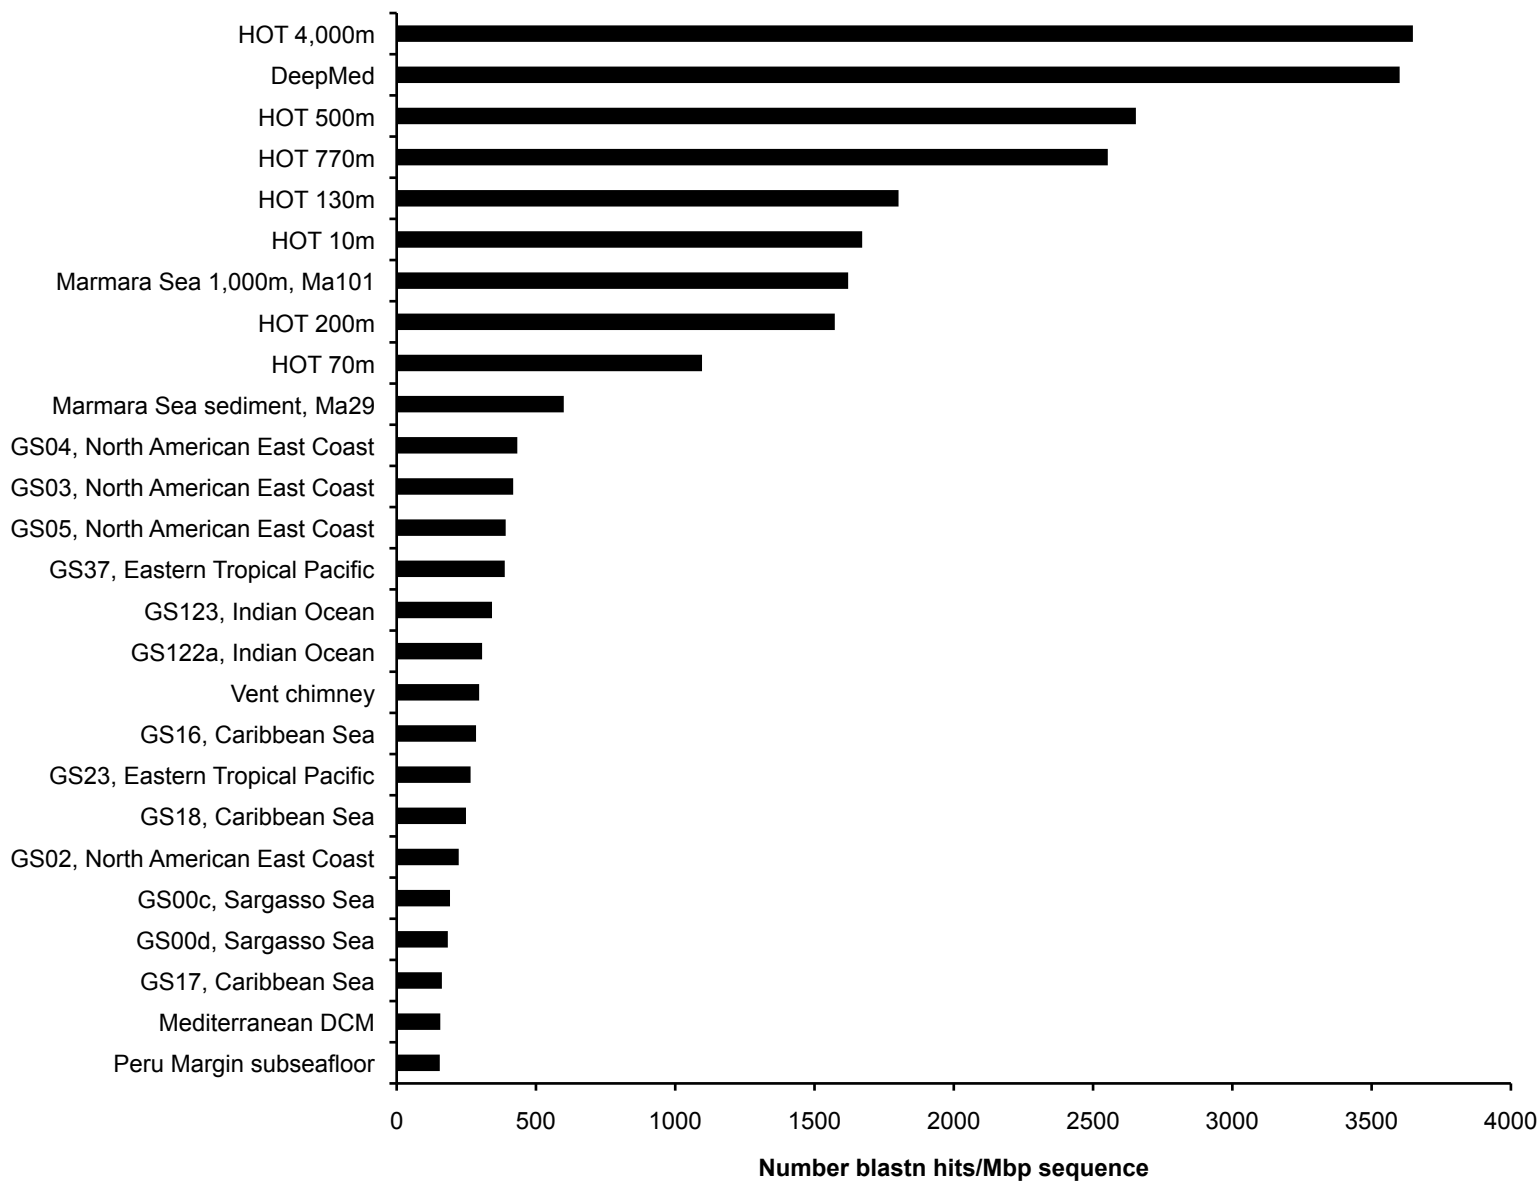

Supplement: S1 (10.1371/journal.pone.0020388.s001) [file journal.pone.0020388.s001]
